# Supplementary material for: Proton pump inhibitor use is not associated with severe COVID-19 related outcomes: A propensity score weighted analysis of a national veteran cohort
Source: bioRxiv or medRxiv preprint supplement (doi:10.1101/2021.07.22.21258785), 2021-07-25

**Supplemental Material – Table of Contents**

Page 1 – Supplemental Methods

Page 2 – Supplemental Table 1

Page 14 – Supplemental Table 2

Page 15 – Supplemental Table 3

Page 16 – Supplemental Figure 1

Page 17 – Supplemental Figure 2

Page 18 – Supplemental Figure 3

**Supplemental Methods, *Additional details regarding the VA COVID-19 Shared Data Resource Domain***

The COVID-19 SDR is a robust data domain that uses case definitions, concept definitions, data mappings, and other information developed from various data sources, all of which are verified, validated, and updated collaboratively across the VHA. The COVID-19 SDR domain includes the following data specifically related to COVID-19, which are defined using a combination of International Classification of Diseases (ICD) versions 9 (ICD-9) and 10 (ICD-10) and Current Procedural Terminology (CPT) codes, natural language processing/keyword text searching of inpatient and outpatient medical encounter notes, pharmacy files, and laboratory tests: confirmed SARS-CoV-2 testing (based on laboratory tests that comply with the Centers for Disease Control and Prevention [CDC] standards, such as the 2019-nCoV RT-PCR Diagnostic Panel and the SARS-CoV-2 Multiplex Assay, or human case review) and results, detailed demographics, extensive covariates, such as comorbidities and prior/current medications, COVID-19 related symptoms (asymptomatic, loss of smell or taste, general systemic, respiratory, or gastrointestinal symptoms), as well as treatments and health-related outcomes, among other Veteran-level details. The VHA's National Surveillance Tool provides near real-time information on all SARS-CoV-2 cases including hospitalization course and outcomes, ensuring that all data are up to date. Data contained within the COVID-19 SDR continually undergo quality checks for accuracy and data refreshes. All phenotype algorithms were validated prior to release in the COVID SDR and are vetted by human review. The data for this study were up to date through March 10, 2021.

**Supplemental Table 1. Covariate definitions\***

|                   | Definition                                                                                                                                                                                                                                                                                                                                                                                                                                                                                                                                                                                                                                                                                                                                                                                                                                                                                                                                                                                                                                                                                                                                                                                                                                                                                                                                                                                                                                                                                                                                                                                                                                                                                                                                                                                                                                                                                                                                                                                                                                                                                                                                                                                                                                                                                                                                                                                                                                                                                                                                                                                                                                                                                                                                                                                                                                                                                                                                                                                                        |
|-------------------|-------------------------------------------------------------------------------------------------------------------------------------------------------------------------------------------------------------------------------------------------------------------------------------------------------------------------------------------------------------------------------------------------------------------------------------------------------------------------------------------------------------------------------------------------------------------------------------------------------------------------------------------------------------------------------------------------------------------------------------------------------------------------------------------------------------------------------------------------------------------------------------------------------------------------------------------------------------------------------------------------------------------------------------------------------------------------------------------------------------------------------------------------------------------------------------------------------------------------------------------------------------------------------------------------------------------------------------------------------------------------------------------------------------------------------------------------------------------------------------------------------------------------------------------------------------------------------------------------------------------------------------------------------------------------------------------------------------------------------------------------------------------------------------------------------------------------------------------------------------------------------------------------------------------------------------------------------------------------------------------------------------------------------------------------------------------------------------------------------------------------------------------------------------------------------------------------------------------------------------------------------------------------------------------------------------------------------------------------------------------------------------------------------------------------------------------------------------------------------------------------------------------------------------------------------------------------------------------------------------------------------------------------------------------------------------------------------------------------------------------------------------------------------------------------------------------------------------------------------------------------------------------------------------------------------------------------------------------------------------------------------------------|
| <b>Conditions</b> |                                                                                                                                                                                                                                                                                                                                                                                                                                                                                                                                                                                                                                                                                                                                                                                                                                                                                                                                                                                                                                                                                                                                                                                                                                                                                                                                                                                                                                                                                                                                                                                                                                                                                                                                                                                                                                                                                                                                                                                                                                                                                                                                                                                                                                                                                                                                                                                                                                                                                                                                                                                                                                                                                                                                                                                                                                                                                                                                                                                                                   |
| Asthma            | ICD9CM: 493, 493.01, 493.02, 493.1, 493.11, 493.12, 493.2, 493.21, 493.22, 493.81, 493.82, 493.9, 493.91, 493.92<br><br>ICD10CM: J45.20, J45.21, J45.22, J45.30, J45.31, J45.32, J45.40, J45.41, J45.42, J45.50, J45.51, J45.52, J45.901, J45.902, J45.909, J45.991, J45.998, J82                                                                                                                                                                                                                                                                                                                                                                                                                                                                                                                                                                                                                                                                                                                                                                                                                                                                                                                                                                                                                                                                                                                                                                                                                                                                                                                                                                                                                                                                                                                                                                                                                                                                                                                                                                                                                                                                                                                                                                                                                                                                                                                                                                                                                                                                                                                                                                                                                                                                                                                                                                                                                                                                                                                                 |
| Cancer            | ICD9CM: 84, 84.2, 84.3, 84.4, 84.5, 84.6, 84.7, 84.8, 84.9, 140, 140.1, 140.3, 140.4, 140.5, 140.6, 140.8, 140.9, 141, 141.1, 141.2, 141.3, 141.4, 141.5, 141.6, 141.8, 141.9, 142, 142.1, 142.2, 142.8, 142.9, 143, 143.1, 143.8, 143.9, 144, 144.1, 144.8, 144.9, 145, 145.1, 145.2, 145.3, 145.4, 145.5, 145.6, 145.8, 145.9, 146, 146.1, 146.2, 146.3, 146.4, 146.5, 146.6, 146.7, 146.8, 146.9, 147, 147.1, 147.2, 147.3, 147.8, 147.9, 148, 148.1, 148.2, 148.3, 148.8, 148.9, 149, 149.1, 149.8, 149.9, 150, 150.1, 150.2, 150.3, 150.4, 150.5, 150.8, 150.9, 151, 151.1, 151.2, 151.3, 151.4, 151.5, 151.6, 151.8, 151.9, 152, 152.1, 152.2, 152.3, 152.8, 152.9, 153, 153.1, 153.2, 153.3, 153.4, 153.5, 153.6, 153.7, 153.8, 153.9, 154, 154.1, 154.2, 154.3, 154.8, 155, 155.1, 155.2, 156, 156.1, 156.2, 156.8, 156.9, 157, 157.1, 157.2, 157.3, 157.4, 157.8, 157.9, 158, 158.8, 158.9, 159, 159.1, 159.8, 159.9, 160, 160.1, 160.2, 160.3, 160.4, 160.5, 160.8, 160.9, 161, 161.1, 161.2, 161.3, 161.8, 161.9, 162, 162.2, 162.3, 162.4, 162.5, 162.8, 162.9, 163, 163.1, 163.8, 163.9, 164, 164.1, 164.2, 164.3, 164.8, 164.9, 165, 165.8, 165.9, 170, 170.1, 170.2, 170.3, 170.4, 170.5, 170.6, 170.7, 170.8, 170.9, 171, 171.2, 171.3, 171.4, 171.5, 171.6, 171.7, 171.8, 171.9, 173.1, 173.11, 173.12, 173.19, 174, 174.1, 174.2, 174.3, 174.4, 174.5, 174.6, 174.8, 174.9, 175, 175.9, 179, 180, 180.1, 180.8, 180.9, 181, 182, 182.1, 182.8, 183, 183.2, 183.3, 183.4, 183.5, 183.8, 183.9, 184, 184.1, 184.2, 184.3, 184.4, 184.8, 184.9, 185, 186, 186.9, 187.1, 187.2, 187.3, 187.4, 187.5, 187.6, 187.7, 187.8, 187.9, 188, 188.1, 188.2, 188.3, 188.4, 188.5, 188.6, 188.7, 188.8, 188.9, 189.1, 189.2, 189.3, 189.4, 189.8, 189.9, 190, 190.1, 190.2, 190.3, 190.4, 190.5, 190.6, 190.7, 190.8, 190.9, 191, 191.1, 191.2, 191.3, 191.4, 191.5, 191.6, 191.7, 191.8, 191.9, 192, 192.1, 192.2, 192.3, 192.8, 192.9, 193, 194, 194.1, 194.3, 194.4, 194.5, 194.6, 194.8, 194.9, 195, 195.1, 195.2, 195.3, 195.4, 195.5, 195.8, 196, 196.1, 196.2, 196.3, 196.5, 196.6, 196.8, 196.9, 197, 197.1, 197.2, 197.3, 197.4, 197.5, 197.6, 197.7, 197.8, 198.1, 198.3, 198.4, 198.5, 198.6, 198.7, 198.81, 198.82, 198.89, 199, 199.1, 199.2, 200.2, 200.21, 200.22, 200.23, 200.24, 200.25, 200.26, 200.27, 200.28, 200.3, 200.31, 200.32, 200.33, 200.34, 200.35, 200.36, 200.37, 200.38, 200.4, 200.41, 200.42, 200.43, 200.44, 200.45, 200.46, 200.47, 200.48, 200.5, 200.51, 200.52, 200.53, 200.54, 200.55, 200.56, 200.57, 200.58, 200.6, 200.61, 200.62, 200.63, 200.64, 200.65, 200.66, 200.67, 200.68, 200.7, 200.71, 200.72, 200.73, 200.74, 200.75, 200.76, 200.77, 200.78, 201.4, 201.41, 201.42, 201.43, 201.44, 201.45, 201.46, 201.47, 201.48, 201.5, 201.51, 201.52, 201.53, 201.54, 201.55, 201.56, 201.57, 201.58, 201.6, 201.61, 201.62, 201.63, 201.64, 201.65, 201.66, 201.67, 201.68, 201.7, 201.71, 201.72, 201.73, 201.74, 201.75, 201.76, 201.77, 201.78, 202, 202.01, |

202.02, 202.03, 202.04, 202.05, 202.06, 202.07, 202.08, 202.1, 202.11, 202.12, 202.13, 202.14, 202.15, 202.16, 202.17, 202.18, 202.2, 202.21, 202.22, 202.23, 202.24, 202.25, 202.26, 202.27, 202.28, 202.3, 202.31, 202.32, 202.33, 202.34, 202.35, 202.36, 202.37, 202.38, 202.4, 202.41, 202.42, 202.43, 202.44, 202.45, 202.46, 202.47, 202.48, 202.5, 202.51, 202.52, 202.53, 202.54, 202.55, 202.56, 202.57, 202.58, 202.6, 202.61, 202.62, 202.63, 202.64, 202.65, 202.66, 202.67, 202.68, 202.7, 202.71, 202.72, 202.73, 202.74, 202.75, 202.76, 202.77, 202.78, 202.8, 202.81, 202.82, 202.83, 202.84, 202.85, 202.86, 202.87, 202.88, 202.9, 202.91, 202.92, 202.93, 202.94, 202.95, 202.96, 202.97, 202.98, 203.1, 203.11, 203.12, 204, 204, 204.01, 204.02, 204.1, 204.1, 204.11, 204.12, 204.2, 204.2, 204.21, 204.22, 204.8, 204.8, 204.81, 204.82, 204.9, 204.9, 204.91, 204.92, 205, 205, 205.01, 205.02, 205.1, 205.1, 205.11, 205.12, 205.2, 205.2, 205.21, 205.22, 205.3, 205.3, 205.31, 205.32, 205.8, 205.8, 205.81, 205.82, 205.9, 205.9, 205.91, 205.92, 206, 206, 206.01, 206.02, 206.1, 206.1, 206.11, 206.12, 206.2, 206.2, 206.21, 206.22, 206.8, 206.8, 206.81, 206.82, 206.9, 206.9, 206.91, 206.92, 207, 207, 207.01, 207.02, 207.1, 207.1, 207.11, 207.12, 207.2, 207.2, 207.21, 207.22, 207.8, 207.8, 207.81, 207.82, 208, 208, 208.01, 208.02, 208.1, 208.1, 208.11, 208.12, 208.2, 208.2, 208.21, 208.22, 208.8, 208.8, 208.81, 208.82, 208.9, 208.9, 208.91, 208.92, 209, 209.01, 209.02, 209.03, 209.1, 209.11, 209.12, 209.13, 209.14, 209.15, 209.16, 209.17, 209.2, 209.21, 209.22, 209.23, 209.24, 209.25, 209.26, 209.27, 209.29, 209.3, 209.31, 209.32, 209.33, 209.34, 209.35, 209.36, 209.7, 209.71, 209.72, 209.73, 209.74, 209.75, 209.79, 230, 230.1, 230.2, 230.3, 230.4, 230.5, 230.6, 230.7, 230.8, 230.9, 231, 231.1, 231.2, 231.8, 231.9, 232.1, 233, 233.1, 233.2, 233.3, 233.3, 233.31, 233.32, 233.39, 233.4, 233.5, 233.6, 233.7, 233.9, 234, 234.8, 234.9, 235, 235.1, 235.2, 235.3, 235.4, 235.5, 235.6, 235.7, 235.8, 235.9, 236, 236.1, 236.2, 236.3, 236.4, 236.5, 236.6, 236.7, 236.9, 236.91, 236.99, 237, 237.1, 237.2, 237.3, 237.4, 237.5, 237.6, 237.7, 237.7, 237.71, 237.72, 237.73, 237.79, 237.9, 238, 238.1, 238.3, 238.4, 238.5, 238.6, 238.7, 238.71, 238.72, 238.73, 238.74, 238.75, 238.76, 238.77, 238.79, 238.8, 238.9, 333.92, 357.3, 380.14, 402, 402.01, 402.1, 402.11, 402.9, 402.91, 403.01, 404.01, 404.02, 404.03, 405.01, 405.09, 511.81, 789.51, 995.86, V84.01, V84.02, V84.03, V84.04, V84.09

ICD10CM: C00.0, C00.1, C00.2, C00.3, C00.4, C00.5, C00.6, C00.8, C00.9, C01., C02.0, C02.1, C02.2, C02.3, C02.4, C02.8, C02.9, C03.0, C03.1, C03.9, C04.0, C04.1, C04.8, C04.9, C05.0, C05.1, C05.2, C05.8, C05.9, C06.0, C06.1, C06.2, C06.80, C06.89, C06.9, C07., C08.0, C08.1, C08.9, C09.0, C09.1, C09.8, C09.9, C10.0, C10.1, C10.2, C10.3, C10.4, C10.8, C10.9, C11.0, C11.1, C11.2, C11.3, C11.8, C11.9, C12., C13.0, C13.1, C13.2, C13.8, C13.9, C14.0, C14.2, C14.8, C15.3, C15.4, C15.5, C15.8, C15.9, C16.0, C16.1, C16.2, C16.3, C16.4, C16.5, C16.6, C16.8, C16.9, C17.0, C17.1, C17.2, C17.3, C17.8, C17.9, C18.0, C18.1, C18.2, C18.3, C18.4, C18.5, C18.6, C18.7, C18.8, C18.9, C19., C20., C21.0, C21.1, C21.2, C21.8, C22.0, C22.1, C22.2, C22.3, C22.4, C22.7, C22.8, C22.9, C23., C24.0, C24.1, C24.8, C24.9, C25.0, C25.1, C25.2, C25.3, C25.4, C25.7, C25.8, C25.9, C26.0,

C26.1, C26.9, C30.0, C30.1, C31.0, C31.1, C31.2, C31.3, C31.8, C31.9, C32.0, C32.1, C32.2, C32.3, C32.8, C32.9, C33., C34.00, C34.01, C34.02, C34.10, C34.11, C34.12, C34.2, C34.30, C34.31, C34.32, C34.80, C34.81, C34.82, C34.90, C34.91, C34.92, C37., C38.0, C38.1, C38.2, C38.3, C38.4, C38.8, C39.0, C39.9, C40.00, C40.01, C40.02, C40.10, C40.11, C40.12, C40.20, C40.21, C40.22, C40.30, C40.31, C40.32, C40.80, C40.81, C40.82, C40.90, C40.91, C40.92, C41.0, C41.1, C41.2, C41.3, C41.4, C41.9, C43.0, C43.10, C43.11, C43.111, C43.112, C43.12, C43.121, C43.122, C43.20, C43.21, C43.22, C43.30, C43.31, C43.39, C43.4, C43.59, C43.60, C43.61, C43.62, C43.70, C43.71, C43.72, C45.0, C45.1, C45.2, C45.7, C45.9, C46.1, C46.2, C46.3, C46.4, C46.50, C46.51, C46.52, C46.7, C46.9, C47.0, C47.10, C47.11, C47.12, C47.20, C47.21, C47.22, C47.3, C47.4, C47.5, C47.6, C47.8, C47.9, C48.0, C48.1, C48.2, C48.8, C49.0, C49.10, C49.11, C49.12, C49.20, C49.21, C49.22, C49.3, C49.4, C49.5, C49.6, C49.8, C49.9, C49.A0, C49.A1, C49.A2, C49.A3, C49.A4, C49.A5, C49.A9, C4A.0, C4A.10, C4A.11, C4A.111, C4A.112, C4A.12, C4A.121, C4A.122, C4A.20, C4A.21, C4A.22, C4A.30, C4A.31, C4A.39, C4A.4, C4A.59, C4A.60, C4A.61, C4A.62, C4A.70, C4A.71, C4A.72, C4A.8, C4A.9, C50.011, C50.012, C50.019, C50.021, C50.022, C50.029, C50.111, C50.112, C50.119, C50.121, C50.122, C50.129, C50.211, C50.212, C50.219, C50.221, C50.222, C50.229, C50.311, C50.312, C50.319, C50.321, C50.322, C50.329, C50.411, C50.412, C50.419, C50.421, C50.422, C50.429, C50.511, C50.512, C50.519, C50.521, C50.522, C50.529, C50.611, C50.612, C50.619, C50.621, C50.622, C50.629, C50.811, C50.812, C50.819, C50.821, C50.822, C50.829, C50.911, C50.912, C50.919, C50.921, C50.922, C50.929, C51.0, C51.1, C51.2, C51.8, C51.9, C52., C53.0, C53.1, C53.8, C53.9, C54.0, C54.1, C54.2, C54.3, C54.8, C54.9, C55., C56.1, C56.2, C56.9, C57.00, C57.01, C57.02, C57.10, C57.11, C57.12, C57.20, C57.21, C57.22, C57.3, C57.4, C57.7, C57.8, C57.9, C58., C60.0, C60.1, C60.2, C60.8, C60.9, C61., C62.00, C62.01, C62.02, C62.10, C62.11, C62.12, C62.90, C62.91, C62.92, C63.00, C63.01, C63.02, C63.10, C63.11, C63.12, C63.2, C63.7, C63.8, C63.9, C64.1, C64.2, C64.9, C65.1, C65.2, C65.9, C66.1, C66.2, C66.9, C67.0, C67.1, C67.2, C67.3, C67.4, C67.5, C67.6, C67.7, C67.8, C67.9, C68.0, C68.1, C68.8, C68.9, C69.00, C69.01, C69.02, C69.10, C69.11, C69.12, C69.20, C69.21, C69.22, C69.30, C69.31, C69.32, C69.40, C69.41, C69.42, C69.50, C69.51, C69.52, C69.60, C69.61, C69.62, C69.80, C69.81, C69.82, C69.90, C69.91, C69.92, C70.0, C70.1, C70.9, C71.0, C71.1, C71.2, C71.3, C71.4, C71.5, C71.6, C71.7, C71.8, C71.9, C72.0, C72.1, C72.20, C72.21, C72.22, C72.30, C72.31, C72.32, C72.40, C72.41, C72.42, C72.50, C72.59, C72.9, C73., C74.00, C74.01, C74.02, C74.10, C74.11, C74.12, C74.90, C74.91, C74.92, C75.0, C75.1, C75.2, C75.3, C75.4, C75.5, C75.8, C75.9, C76.0, C76.1, C76.2, C76.3, C76.40, C76.41, C76.42, C76.50, C76.51, C76.52, C76.8, C77.0, C77.1, C77.2, C77.3, C77.4, C77.5, C77.8, C77.9, C78.00, C78.01, C78.02, C78.1, C78.2, C78.30, C78.39, C78.4, C78.5, C78.6, C78.7, C78.80, C78.89, C79.00, C79.01, C79.02, C79.10, C79.11, C79.19, C79.31, C79.32, C79.40, C79.49, C79.51,

C79.52, C79.60, C79.61, C79.62, C79.70, C79.71, C79.72, C79.81, C79.82, C79.89, C79.9, C7A.00, C7A.010, C7A.011, C7A.012, C7A.019, C7A.020, C7A.021, C7A.022, C7A.023, C7A.024, C7A.025, C7A.026, C7A.029, C7A.090, C7A.091, C7A.092, C7A.093, C7A.094, C7A.095, C7A.096, C7A.098, C7A.1, C7A.8, C7B.00, C7B.01, C7B.02, C7B.03, C7B.04, C7B.09, C7B.1, C7B.8, C80.0, C80.1, C80.2, C81.00, C81.01, C81.02, C81.03, C81.04, C81.05, C81.06, C81.07, C81.08, C81.09, C81.10, C81.11, C81.12, C81.13, C81.14, C81.15, C81.16, C81.17, C81.18, C81.19, C81.20, C81.21, C81.22, C81.23, C81.24, C81.25, C81.26, C81.27, C81.28, C81.29, C81.30, C81.31, C81.32, C81.33, C81.34, C81.35, C81.36, C81.37, C81.38, C81.39, C81.40, C81.41, C81.42, C81.43, C81.44, C81.45, C81.46, C81.47, C81.48, C81.49, C81.70, C81.71, C81.72, C81.73, C81.74, C81.75, C81.76, C81.77, C81.78, C81.79, C81.90, C81.91, C81.92, C81.93, C81.94, C81.95, C81.96, C81.97, C81.98, C81.99, C82.00, C82.01, C82.02, C82.03, C82.04, C82.05, C82.06, C82.07, C82.08, C82.09, C82.10, C82.11, C82.12, C82.13, C82.14, C82.15, C82.16, C82.17, C82.18, C82.19, C82.20, C82.21, C82.22, C82.23, C82.24, C82.25, C82.26, C82.27, C82.28, C82.29, C82.30, C82.31, C82.32, C82.33, C82.34, C82.35, C82.36, C82.37, C82.38, C82.39, C82.40, C82.41, C82.42, C82.43, C82.44, C82.45, C82.46, C82.47, C82.48, C82.49, C82.50, C82.51, C82.52, C82.53, C82.54, C82.55, C82.56, C82.57, C82.58, C82.59, C82.60, C82.61, C82.62, C82.63, C82.64, C82.65, C82.66, C82.67, C82.68, C82.69, C82.80, C82.81, C82.82, C82.83, C82.84, C82.85, C82.86, C82.87, C82.88, C82.89, C82.90, C82.91, C82.92, C82.93, C82.94, C82.95, C82.96, C82.97, C82.98, C82.99, C83.00, C83.01, C83.02, C83.03, C83.04, C83.05, C83.06, C83.07, C83.08, C83.09, C83.10, C83.11, C83.12, C83.13, C83.14, C83.15, C83.16, C83.17, C83.18, C83.19, C83.30, C83.31, C83.32, C83.33, C83.34, C83.35, C83.36, C83.37, C83.38, C83.39, C83.50, C83.51, C83.52, C83.53, C83.54, C83.55, C83.56, C83.57, C83.58, C83.59, C83.70, C83.71, C83.72, C83.73, C83.74, C83.75, C83.76, C83.77, C83.78, C83.79, C83.80, C83.81, C83.82, C83.83, C83.84, C83.85, C83.86, C83.87, C83.88, C83.89, C83.90, C83.91, C83.92, C83.93, C83.94, C83.95, C83.96, C83.97, C83.98, C83.99, C84.00, C84.01, C84.02, C84.03, C84.04, C84.05, C84.06, C84.07, C84.08, C84.09, C84.10, C84.11, C84.12, C84.13, C84.14, C84.15, C84.16, C84.17, C84.18, C84.19, C84.40, C84.41, C84.42, C84.43, C84.44, C84.45, C84.46, C84.47, C84.48, C84.49, C84.60, C84.61, C84.62, C84.63, C84.64, C84.65, C84.66, C84.67, C84.68, C84.69, C84.70, C84.71, C84.72, C84.73, C84.74, C84.75, C84.76, C84.77, C84.78, C84.79, C84.90, C84.91, C84.92, C84.93, C84.94, C84.95, C84.96, C84.97, C84.98, C84.99, C84.A0, C84.A1, C84.A2, C84.A3, C84.A4, C84.A5, C84.A6, C84.A7, C84.A8, C84.A9, C84.Z0, C84.Z1, C84.Z2, C84.Z3, C84.Z4, C84.Z5, C84.Z6, C84.Z7, C84.Z8, C84.Z9, C85.10, C85.11, C85.12, C85.13, C85.14, C85.15, C85.16, C85.17, C85.18, C85.19, C85.20, C85.21, C85.22, C85.23, C85.24, C85.25, C85.26, C85.27, C85.28, C85.29, C85.80, C85.81, C85.82, C85.83, C85.84, C85.85, C85.86, C85.87,

C85.88, C85.89, C85.90, C85.91, C85.92, C85.93, C85.94, C85.95, C85.96, C85.97, C85.98, C85.99, C86.0, C86.1, C86.2, C86.3, C86.4, C86.5, C86.6, C88.0, C88.2, C88.3, C88.4, C88.8, C88.9, C90.00, C90.01, C90.02, C90.10, C90.11, C90.12, C90.20, C90.21, C90.22, C90.30, C90.31, C90.32, C91.00, C91.01, C91.02, C91.10, C91.11, C91.12, C91.30, C91.31, C91.32, C91.40, C91.41, C91.42, C91.50, C91.51, C91.52, C91.60, C91.61, C91.62, C91.90, C91.91, C91.92, C91.A0, C91.A1, C91.A2, C91.Z0, C91.Z1, C91.Z2, C92.00, C92.01, C92.02, C92.10, C92.11, C92.12, C92.20, C92.21, C92.22, C92.30, C92.31, C92.32, C92.40, C92.41, C92.42, C92.50, C92.51, C92.52, C92.60, C92.61, C92.62, C92.90, C92.91, C92.92, C92.A0, C92.A1, C92.A2, C92.Z0, C92.Z1, C92.Z2, C93.00, C93.01, C93.02, C93.10, C93.11, C93.12, C93.30, C93.31, C93.32, C93.90, C93.91, C93.92, C93.Z0, C93.Z1, C93.Z2, C94.00, C94.01, C94.02, C94.20, C94.21, C94.22, C94.30, C94.31, C94.32, C94.40, C94.41, C94.42, C94.6, C94.80, C94.81, C94.82, C95.00, C95.01, C95.02, C95.10, C95.11, C95.12, C95.90, C95.91, C95.92, C96.0, C96.2, C96.20, C96.21, C96.22, C96.29, C96.4, C96.5, C96.6, C96.9, C96.A, C96.Z, D00.00, D00.01, D00.02, D00.03, D00.04, D00.05, D00.06, D00.07, D00.08, D00.1, D00.2, D01.0, D01.1, D01.2, D01.3, D01.40, D01.49, D01.5, D01.7, D01.9, D02.0, D02.1, D02.20, D02.21, D02.22, D02.3, D02.4, D03.0, D03.10, D03.11, D03.111, D03.112, D03.12, D03.121, D03.122, D03.20, D03.21, D03.22, D03.30, D03.39, D03.4, D03.59, D03.60, D03.61, D03.62, D03.70, D03.71, D03.72, D03.8, D03.9, D05.00, D05.01, D05.02, D05.10, D05.11, D05.12, D05.80, D05.81, D05.82, D05.90, D05.91, D05.92, D06.0, D06.1, D06.7, D06.9, D07.0, D07.1, D07.2, D07.30, D07.39, D07.4, D07.5, D07.60, D07.61, D07.69, D09.0, D09.10, D09.19, D09.20, D09.21, D09.22, D09.3, D09.8, D09.9, D18.00, D18.02, D18.03, D18.09, D18.1, D22.0, D22.10, D22.11, D22.111, D22.112, D22.12, D22.121, D22.122, D22.20, D22.21, D22.22, D22.30, D22.39, D22.4, D22.5, D22.60, D22.61, D22.62, D22.70, D22.71, D22.72, D22.9, D25.0, D25.1, D25.2, D25.9, D37.01, D37.02, D37.030, D37.031, D37.032, D37.039, D37.04, D37.05, D37.09, D37.1, D37.2, D37.3, D37.4, D37.5, D37.6, D37.8, D37.9, D38.0, D38.1, D38.2, D38.3, D38.4, D38.5, D38.6, D39.0, D39.10, D39.11, D39.12, D39.2, D39.8, D39.9, D40.0, D40.10, D40.11, D40.12, D40.8, D40.9, D41.00, D41.01, D41.02, D41.10, D41.11, D41.12, D41.20, D41.21, D41.22, D41.3, D41.4, D41.8, D41.9, D42.0, D42.1, D42.9, D43.0, D43.1, D43.2, D43.3, D43.4, D43.8, D43.9, D44.0, D44.10, D44.11, D44.12, D44.2, D44.3, D44.4, D44.5, D44.6, D44.7, D44.9, D45., D46.0, D46.1, D46.20, D46.21, D46.22, D46.4, D46.9, D46.A, D46.B, D46.C, D46.Z, D47.0, D47.01, D47.02, D47.09, D47.1, D47.2, D47.3, D47.4, D47.9, D47.Z1, D47.Z2, D47.Z9, D48.0, D48.1, D48.2, D48.3, D48.4, D48.60, D48.61, D48.62, D48.7, D48.9, D49.0, D49.1, D49.3, D49.4, D49.5, D49.511, D49.512, D49.519, D49.59, D49.6, D49.7, D49.81, D49.89, D49.9, D61.810, D63.0, D64.81, D70.1, E31.22, E31.23, E88.3, G13.1, G73.1, G89.3, H47.42, H47.521, H47.522, H47.529, H47.631, H47.632, H47.639, J91.0, K12.31, K31.7, K63.5, M36.0, M36.1, M84.50XA, M84.511A, M84.512A, M84.519A, M84.521A, M84.522A, M84.529A, M84.531A,

|                         |                                                                                                                                                                                                                                                                                                                                                                                                                                                                                                                                                                                                                                                                                                                                                                                                                                                                                                                                                                                                                                                             |
|-------------------------|-------------------------------------------------------------------------------------------------------------------------------------------------------------------------------------------------------------------------------------------------------------------------------------------------------------------------------------------------------------------------------------------------------------------------------------------------------------------------------------------------------------------------------------------------------------------------------------------------------------------------------------------------------------------------------------------------------------------------------------------------------------------------------------------------------------------------------------------------------------------------------------------------------------------------------------------------------------------------------------------------------------------------------------------------------------|
|                         | M84.532A, M84.533A, M84.534A, M84.539A, M84.541A, M84.542A, M84.549A, M84.550A, M84.551A, M84.552A, M84.553A, M84.559A, M84.561A, M84.562A, M84.563A, M84.564A, M84.569A, M84.571A, M84.572A, M84.573A, M84.574A, M84.575A, M84.576A, M84.58XA, N52.36, R18.0, R53.0, T80.810A, T80.810D, T80.810S                                                                                                                                                                                                                                                                                                                                                                                                                                                                                                                                                                                                                                                                                                                                                          |
| Cardiomyopathy          | ICD9CM: 425, 425.1, 425.11, 425.18, 425.2, 425.3, 425.4, 425.5, 425.7, 425.8, 425.9<br><br>ICD10CM: A36.81, A38.1, A39.50, A39.52, B26.82, B33.20, B33.22, B33.24, B58.81, I40.0, I40.1, I40.8, I40.9, I41., I42.0, I42.1, I42.2, I42.3, I42.4, I42.5, I42.6, I42.8, I42.9, I43., I51.4                                                                                                                                                                                                                                                                                                                                                                                                                                                                                                                                                                                                                                                                                                                                                                     |
| Cerebrovascular Disease | ICD9CM: 346.6, 346.61, 346.62, 346.63, 430, 431, 432, 432.1, 432.9, 433, 433, 433.01, 433.1, 433.1, 433.11, 433.2, 433.2, 433.21, 433.3, 433.3, 433.31, 433.8, 433.8, 433.81, 433.9, 433.9, 433.91, 434, 434, 434.01, 434.1, 434.1, 434.11, 434.9, 434.9, 434.91, 435, 435.1, 435.2, 435.3, 435.8, 435.9, 436, 437, 437.1, 437.2, 437.3, 437.4, 437.5, 437.6, 437.7, 437.8, 437.9, 438, 438, 438.1, 438.11, 438.12, 438.13, 438.14, 438.19, 438.2, 438.21, 438.22, 438.3, 438.31, 438.32, 438.4, 438.41, 438.42, 438.5, 438.51, 438.52, 438.53, 438.6, 438.7, 438.81, 438.82, 438.83, 438.84, 438.85, 438.89, 438.9<br><br>ICD10CM: I60.00, I60.01, I60.02, I60.10, I60.11, I60.12, I60.2, I60.20, I60.21, I60.22, I60.30, I60.31, I60.32, I60.4, I60.50, I60.51, I60.52, I60.6, I60.7, I60.8, I60.9, I61.0, I61.1, I61.2, I61.3, I61.4, I61.5, I61.6, I61.8, I61.9, I62.00, I62.01, I62.02, I62.03, I62.1, I62.9, I67.1, I67.2, I67.3, I67.5, I67.6, I67.7, I67.81, I67.82, I67.83, I67.841, I67.848, I67.850, I67.858, I67.89, I67.9, I68.0, I68.2, I68.8 |
| Chronic Kidney Disease  | ICD9CM: 285.21, 361.04, 364.76, 403.01, 403.1, 403.11, 403.9, 403.91, 404.01, 404.02, 404.03, 404.1, 404.11, 404.12, 404.13, 404.9, 404.91, 404.92, 404.93, 458.21, 585.1, 585.2, 585.3, 585.4, 585.5, 585.9, 753.1, 753.19, 792.5, 996.56, 996.68, 996.73, V45.1, V45.11, V45.12, V56.0, V56.1, V56.2, V56.31, V56.32, V56.8<br><br>ICD10CM: D63.1, E08.22, E09.22, E10.22, E11.22, E13.22, I12.0, I12.9, I13.0, I13.10, I13.11, I13.2, N18.1, N18.2, N18.3, N18.4, N18.5, N18.6, N18.9, R88.0, Z49.01, Z49.02, Z49.31, Z49.32                                                                                                                                                                                                                                                                                                                                                                                                                                                                                                                             |
| Chronic Kidney Failure  | ICD9CM: 403.01, 403.11, 403.91, 404.02, 404.03, 404.12, 404.13, 404.92, 404.93, 585.5, 585.6<br><br>ICD10CM: I12.0, I13.11, I13.2, N18.6, N99.0                                                                                                                                                                                                                                                                                                                                                                                                                                                                                                                                                                                                                                                                                                                                                                                                                                                                                                             |
| Chronic Lung Disease    | ICD9CM: 491.1, 491.2, 491.21, 491.22, 491.8, 491.9, 492.8, 493, 493.01, 493.02, 493.1, 493.11, 493.12, 493.2, 493.21, 493.22, 493.81, 493.82, 493.9, 493.91, 493.92, 496, 506.4, 516.1, 516.31, 516.4, 516.69, 518.1, 518.2, 518.3, 518.6, 714.81, 748.4, 748.5, 748.61, 748.69<br><br>ICD10CM: B44.81, J41.0, J41.1, J41.8, J42., J43.1, J43.2, J43.8, J43.9, J44.0, J44.1, J44.9, J45.20, J45.21, J45.22, J45.30, J45.31, J45.32, J45.40, J45.41, J45.42, J45.50, J45.51, J45.52, J45.901, J45.902, J45.909, J45.990, J45.991, J45.998, J68.4,                                                                                                                                                                                                                                                                                                                                                                                                                                                                                                            |



|                                         |                                                                                                                                                                                                                                                                                                                                                                                                                                                                                                                                                                                                                                                                                                                                                                                                                                                                                                                                                                                                                                                                                                                                                                                                                                                                                                                                                                                                                                                                                                                                                                                                                                                                                                                                                                                                                                                                                                                       |
|-----------------------------------------|-----------------------------------------------------------------------------------------------------------------------------------------------------------------------------------------------------------------------------------------------------------------------------------------------------------------------------------------------------------------------------------------------------------------------------------------------------------------------------------------------------------------------------------------------------------------------------------------------------------------------------------------------------------------------------------------------------------------------------------------------------------------------------------------------------------------------------------------------------------------------------------------------------------------------------------------------------------------------------------------------------------------------------------------------------------------------------------------------------------------------------------------------------------------------------------------------------------------------------------------------------------------------------------------------------------------------------------------------------------------------------------------------------------------------------------------------------------------------------------------------------------------------------------------------------------------------------------------------------------------------------------------------------------------------------------------------------------------------------------------------------------------------------------------------------------------------------------------------------------------------------------------------------------------------|
|                                         | J70.1, J81.1, J82., J84.03, J84.112, J98.3, M05.10, M05.111, M05.112, M05.119, M05.121, M05.122, M05.129, M05.131, M05.132, M05.139, M05.141, M05.142, M05.149, M05.151, M05.152, M05.159, M05.161, M05.162, M05.169, M05.171, M05.172, M05.179, M05.19, M30.1, Q32.2, Q32.3, Q32.4, Q33.0, Q33.1, Q33.2, Q33.3, Q33.4, Q33.5, Q33.6, Q33.8, Q33.9                                                                                                                                                                                                                                                                                                                                                                                                                                                                                                                                                                                                                                                                                                                                                                                                                                                                                                                                                                                                                                                                                                                                                                                                                                                                                                                                                                                                                                                                                                                                                                    |
| Chronic Neuromuscular Disease           | <p>ICD9CM: 307.22, 322, 322.1, 322.2, 322.9, 330, 330.1, 330.2, 330.3, 330.8, 330.9, 331, 331.1, 331.11, 331.19, 331.2, 331.3, 331.4, 331.5, 331.6, 331.7, 331.81, 331.82, 331.83, 331.89, 331.9, 333.4, 334, 334.1, 334.2, 334.3, 334.4, 334.8, 334.9, 335.21, 336.2, 337.2, 337.21, 337.22, 337.29, 339.2, 339.21, 339.22, 340, 341, 341.1, 341.2, 341.21, 341.22, 341.8, 341.9, 346.71, 348, 348.1, 348.2, 348.3, 348.3, 348.31, 348.39, 348.4, 348.5, 348.8, 348.81, 348.82, 348.89, 348.9, 354.4, 355.71, 356.3, 357.81, 364, 364.01, 364.02, 364.03, 364.04, 364.05, 364.1, 364.11, 364.21, 364.22, 364.23, 364.24, 364.3, 364.41, 364.42, 364.51, 364.52, 364.53, 364.54, 364.55, 364.56, 364.57, 364.59, 364.6, 364.61, 364.62, 364.63, 364.64, 364.7, 364.71, 364.72, 364.73, 364.74, 364.75, 364.76, 364.77, 364.8, 364.81, 364.82, 364.89, 364.9, 377.1, 377.11, 377.12, 377.13, 377.14, 377.15, 377.16, 378.72, 733.7, 773.4, 774.7, 780.03, 948.4</p> <p>ICD10CM: A50.44, E75.23, E83.01, E88.42, F95.1, G03.1, G03.2, G10., G11.4, G14., G23.0, G23.1, G23.2, G30.0, G30.1, G30.8, G30.9, G31.01, G31.09, G31.1, G31.2, G31.81, G31.82, G31.83, G31.85, G31.89, G32.0, G32.89, G35., G36.0, G36.8, G36.9, G37.0, G37.1, G37.2, G37.4, G37.5, G37.8, G37.9, G43.711, G43.719, G56.40, G56.41, G56.42, G56.43, G57.70, G57.71, G57.72, G57.73, G60.1, G61.81, G90.3, G90.50, G90.511, G90.512, G90.513, G90.519, G90.521, G90.522, G90.523, G90.529, G90.59, G91.4, G93.0, H47.20, H47.211, H47.212, H47.213, H47.219, H47.22, H47.231, H47.232, H47.233, H47.239, H47.291, H47.292, H47.293, H47.299, H49.40, H49.41, H49.42, H49.43, I62.03, M89.00, M89.011, M89.012, M89.019, M89.021, M89.022, M89.029, M89.031, M89.032, M89.039, M89.041, M89.042, M89.049, M89.051, M89.052, M89.059, M89.061, M89.062, M89.069, M89.071, M89.072, M89.079, M89.08, M89.09, P57.0, P57.8, P57.9, P91.1, R40.3</p> |
| Chronic Obstructive Pulmonary Disease   | <p>ICD9CM: 115, 115.01, 115.02, 115.03, 115.04, 115.05, 115.09, 115.1, 115.11, 115.12, 115.13, 115.14, 115.15, 115.19, 115.9, 115.91, 115.92, 115.93, 115.94, 115.95, 115.99, 490, 491.1, 491.2, 491.21, 491.22, 491.8, 491.9, 492.8, 494, 494.1, 496, 748.61</p> <p>ICD10CM: J41.0 J41.1, J41.8, J42., J43.0, J43.1, J43.2, J43.8, J43.9, J44.0, J44.1, J44.9, J47.0, J47.1, J47.9</p>                                                                                                                                                                                                                                                                                                                                                                                                                                                                                                                                                                                                                                                                                                                                                                                                                                                                                                                                                                                                                                                                                                                                                                                                                                                                                                                                                                                                                                                                                                                               |
| Coronary Artery Disease / Heart Disease | <p>ICD9CM: 391.1, 391.2, 391.8, 391.9, 411.8, 411.89, 413.9, 414.01, 414.06, 414.3, 414.4, 414.8, 414.9, 425.1, 425.11, 425.18, 425.2, 425.7, 425.8, 425.9, 440.1, 440.2, 440.21, 440.22, 440.23, 440.24, 440.29, 440.8, 440.9</p> <p>ICD10CM: I20.0, I20.1, I20.8, I20.9, I24.0, I24.8, I24.9, I25.10, I25.110, I25.111, I25.118, I25.119, I25.2, I25.5, I25.6, I25.700,</p>                                                                                                                                                                                                                                                                                                                                                                                                                                                                                                                                                                                                                                                                                                                                                                                                                                                                                                                                                                                                                                                                                                                                                                                                                                                                                                                                                                                                                                                                                                                                         |

|                          |                                                                                                                                                                                                                                                                                                                                                                                                                                                                                                                                                                                                                                                                                                                                                                                                                                                                                                                                                                                                                                                                                                                                                                                                                                                                                                                                                                                                                                                                                                                                                                                                                                                                                                                                                                                                                                                                                                                                                                                                                                                                                                                                                                                                                                                                                                                                                                                                                                                                                                                                                                                                                                                                                |
|--------------------------|--------------------------------------------------------------------------------------------------------------------------------------------------------------------------------------------------------------------------------------------------------------------------------------------------------------------------------------------------------------------------------------------------------------------------------------------------------------------------------------------------------------------------------------------------------------------------------------------------------------------------------------------------------------------------------------------------------------------------------------------------------------------------------------------------------------------------------------------------------------------------------------------------------------------------------------------------------------------------------------------------------------------------------------------------------------------------------------------------------------------------------------------------------------------------------------------------------------------------------------------------------------------------------------------------------------------------------------------------------------------------------------------------------------------------------------------------------------------------------------------------------------------------------------------------------------------------------------------------------------------------------------------------------------------------------------------------------------------------------------------------------------------------------------------------------------------------------------------------------------------------------------------------------------------------------------------------------------------------------------------------------------------------------------------------------------------------------------------------------------------------------------------------------------------------------------------------------------------------------------------------------------------------------------------------------------------------------------------------------------------------------------------------------------------------------------------------------------------------------------------------------------------------------------------------------------------------------------------------------------------------------------------------------------------------------|
|                          | I25.701, I25.708, I25.709, I25.710, I25.711, I25.718, I25.719, I25.720, I25.721, I25.728, I25.729, I25.730, I25.731, I25.738, I25.739, I25.750, I25.751, I25.758, I25.759, I25.760, I25.761, I25.768, I25.769, I25.790, I25.791, I25.798, I25.799, I25.810, I25.811, I25.812, I25.82, I25.83, I25.84, I25.89, I25.9, Z95.1, Z95.5, Z98.61                                                                                                                                                                                                                                                                                                                                                                                                                                                                                                                                                                                                                                                                                                                                                                                                                                                                                                                                                                                                                                                                                                                                                                                                                                                                                                                                                                                                                                                                                                                                                                                                                                                                                                                                                                                                                                                                                                                                                                                                                                                                                                                                                                                                                                                                                                                                      |
| Congestive Heart Failure | ICD9CM: 428<br><br>ICD10CM: I50.20, I50.21, I50.22, I50.23, I50.30, I50.31, I50.32, I50.33, I50.40, I50.41                                                                                                                                                                                                                                                                                                                                                                                                                                                                                                                                                                                                                                                                                                                                                                                                                                                                                                                                                                                                                                                                                                                                                                                                                                                                                                                                                                                                                                                                                                                                                                                                                                                                                                                                                                                                                                                                                                                                                                                                                                                                                                                                                                                                                                                                                                                                                                                                                                                                                                                                                                     |
| Diabetes Mellitus        | ICD9CM: 249.00, 249.01, 249.10, 249.11, 249.20, 249.21, 249.30, 249.31, 249.40, 249.41, 249.50, 249.51, 249.60, 249.61, 249.70, 249.71, 249.80, 249.81, 249.90, 249.91, 250.00, 250.01, 250.02, 250.03, 250.10, 250.11, 250.12, 250.13, 250.20, 250.21, 250.22, 250.23, 250.30, 250.31, 250.32, 250.33, 250.40, 250.41, 250.42, 250.43, 250.50, 250.51, 250.52, 250.53, 250.60, 250.61, 250.62, 250.63, 250.70, 250.71, 250.72, 250.73, 250.80, 250.81, 250.82, 250.83, 250.90, 250.91, 250.92, 250.93, 357.2, 362.01, 362.02, 362.03, 362.04, 362.05, 362.06, 362.07, 366.41, V45.85, V53.91<br><br>ICD10CM: E08.00, E08.01, E08.10, E08.11, E08.21, E08.22, E08.29, E08.311, E08.319, E08.3211, E08.3212, E08.3213, E08.3219, E08.3291, E08.3292, E08.3293, E08.3299, E08.3311, E08.3312, E08.3313, E08.3319, E08.3391, E08.3392, E08.3393, E08.3399, E08.3411, E08.3412, E08.3413, E08.3419, E08.3491, E08.3492, E08.3493, E08.3499, E08.3511, E08.3512, E08.3513, E08.3519, E08.3521, E08.3522, E08.3523, E08.3529, E08.3531, E08.3532, E08.3533, E08.3539, E08.3541, E08.3542, E08.3543, E08.3549, E08.3551, E08.3552, E08.3553, E08.3559, E08.3591, E08.3592, E08.3593, E08.3599, E08.36, E08.37X1, E08.37X2, E08.37X3, E08.37X9, E08.39, E08.40, E08.41, E08.42, E08.43, E08.44, E08.49, E08.51, E08.52, E08.59, E08.610, E08.618, E08.620, E08.621, E08.622, E08.628, E08.630, E08.638, E08.641, E08.649, E08.65, E08.69, E08.8, E08.9, E09.00, E09.01, E09.10, E09.11, E09.21, E09.22, E09.29, E09.311, E09.319, E09.3211, E09.3212, E09.3213, E09.3219, E09.3291, E09.3292, E09.3293, E09.3299, E09.3311, E09.3312, E09.3313, E09.3319, E09.3391, E09.3392, E09.3393, E09.3399, E09.3411, E09.3412, E09.3413, E09.3419, E09.3491, E09.3492, E09.3493, E09.3499, E09.3511, E09.3512, E09.3513, E09.3519, E09.3521, E09.3522, E09.3523, E09.3529, E09.3531, E09.3532, E09.3533, E09.3539, E09.3541, E09.3542, E09.3543, E09.3549, E09.3551, E09.3552, E09.3553, E09.3559, E09.3591, E09.3592, E09.3593, E09.3599, E09.36, E09.37X1, E09.37X2, E09.37X3, E09.37X9, E09.39, E09.40, E09.41, E09.42, E09.43, E09.44, E09.49, E09.51, E09.52, E09.59, E09.610, E09.618, E09.620, E09.621, E09.622, E09.628, E09.630, E09.638, E09.641, E09.649, E09.65, E09.69, E09.8, E09.9, E10.10, E10.11, E10.21, E10.22, E10.29, E10.311, E10.319, E10.321, E10.3211, E10.3212, E10.3213, E10.3219, E10.329, E10.3291, E10.3292, E10.3293, E10.3299, E10.331, E10.3311, E10.3312, E10.3313, E10.3319, E10.339, E10.3391, E10.3392, E10.3393, E10.3399, E10.341, E10.3411, E10.3412, E10.3413, E10.3419, E10.349, E10.3491, E10.3492, E10.3493, E10.3499, E10.351, E10.3511, E10.3512, |

|                 |                                                                                                                                                                                                                                                                                                                                                                                                                                                                                                                                                                                                                                                                                                                                                                                                                                                                                                                                                                                                                                                                                                                                                                                                                                                                                                                                                                                                                                                                                                                                                                                                                                                                                                                                                                                                                                                                                                                                                                                                                                                                                                                                                                                                                                                                                                                                                                   |
|-----------------|-------------------------------------------------------------------------------------------------------------------------------------------------------------------------------------------------------------------------------------------------------------------------------------------------------------------------------------------------------------------------------------------------------------------------------------------------------------------------------------------------------------------------------------------------------------------------------------------------------------------------------------------------------------------------------------------------------------------------------------------------------------------------------------------------------------------------------------------------------------------------------------------------------------------------------------------------------------------------------------------------------------------------------------------------------------------------------------------------------------------------------------------------------------------------------------------------------------------------------------------------------------------------------------------------------------------------------------------------------------------------------------------------------------------------------------------------------------------------------------------------------------------------------------------------------------------------------------------------------------------------------------------------------------------------------------------------------------------------------------------------------------------------------------------------------------------------------------------------------------------------------------------------------------------------------------------------------------------------------------------------------------------------------------------------------------------------------------------------------------------------------------------------------------------------------------------------------------------------------------------------------------------------------------------------------------------------------------------------------------------|
|                 | <p>E10.3513, E10.3519, E10.3521, E10.3522, E10.3523, E10.3529, E10.3531, E10.3532, E10.3533, E10.3539, E10.3541, E10.3542, E10.3543, E10.3549, E10.3551, E10.3552, E10.3553, E10.3559, E10.359, E10.3591, E10.3592, E10.3593, E10.3599, E10.36, E10.37X1, E10.37X2, E10.37X3, E10.37X9, E10.39, E10.40, E10.41, E10.42, E10.43, E10.44, E10.49, E10.51, E10.52, E10.59, E10.610, E10.618, E10.620, E10.621, E10.622, E10.628, E10.630, E10.638, E10.640, E10.641, E10.649, E10.65, E10.69, E10.8, E10.9, E11.00, E11.01, E11.10, E11.11, E11.21, E11.22, E11.29, E11.311, E11.319, E11.321, E11.3211, E11.3212, E11.3213, E11.3219, E11.329, E11.3291, E11.3292, E11.3293, E11.3299, E11.331, E11.3311, E11.3312, E11.3313, E11.3319, E11.339, E11.3391, E11.3392, E11.3393, E11.3399, E11.341, E11.3411, E11.3412, E11.3413, E11.3419, E11.349, E11.3491, E11.3492, E11.3493, E11.3499, E11.351, E11.3511, E11.3512, E11.3513, E11.3519, E11.3521, E11.3522, E11.3523, E11.3529, E11.3531, E11.3532, E11.3533, E11.3539, E11.3541, E11.3542, E11.3543, E11.3549, E11.3551, E11.3552, E11.3553, E11.3559, E11.359, E11.3591, E11.3592, E11.3593, E11.3599, E11.36, E11.37X1, E11.37X2, E11.37X3, E11.37X9, E11.39, E11.40, E11.41, E11.42, E11.43, E11.44, E11.49, E11.51, E11.52, E11.59, E11.610, E11.618, E11.620, E11.621, E11.622, E11.628, E11.630, E11.638, E11.640, E11.641, E11.649, E11.65, E11.69, E11.8, E11.9, E13.00, E13.01, E13.10, E13.11, E13.21, E13.22, E13.29, E13.311, E13.319, E13.321, E13.3211, E13.3212, E13.3213, E13.3219, E13.329, E13.3291, E13.3292, E13.3293, E13.3299, E13.331, E13.3311, E13.3312, E13.3313, E13.3319, E13.339, E13.3391, E13.3392, E13.3393, E13.3399, E13.341, E13.3411, E13.3412, E13.3413, E13.3419, E13.349, E13.3491, E13.3492, E13.3493, E13.3499, E13.351, E13.3511, E13.3512, E13.3513, E13.3519, E13.3521, E13.3522, E13.3523, E13.3529, E13.3531, E13.3532, E13.3533, E13.3539, E13.3541, E13.3542, E13.3543, E13.3549, E13.3551, E13.3552, E13.3553, E13.3559, E13.359, E13.3591, E13.3592, E13.3593, E13.3599, E13.36, E13.37X1, E13.37X2, E13.37X3, E13.37X9, E13.39, E13.40, E13.41, E13.42, E13.43, E13.44, E13.49, E13.51, E13.52, E13.59, E13.610, E13.618, E13.620, E13.621, E13.622, E13.628, E13.630, E13.638, E13.640, E13.641, E13.649, E13.65, E13.69, E13.8, E13.9, Z46.81, Z96.41</p> |
| Drug Dependency | <p>ICD9CM: 304.103, 304.104, 304.105, 304.106, 304.107, 304.108, 304.109, 304.11, 304.11, 304.111, 304.112, 304.113, 304.114, 304.115, 304.116, 304.117, 304.118, 304.119, 304.12, 304.12, 304.121, 304.122, 304.123, 304.124, 304.125, 304.126, 304.127, 304.128, 304.129, 304.13, 304.13, 304.131, 304.132, 304.133, 304.134, 304.135, 304.136, 304.137, 304.138, 304.139, 304.14, 304.15, 304.16, 304.17, 304.18, 304.19, 304.2, 304.21, 304.22, 304.23, 304.3, 304.3, 304.309, 304.31, 304.31, 304.319, 304.32, 304.32, 304.329, 304.33, 304.33, 304.339, 304.39, 304.4, 304.4, 304.401, 304.409, 304.41, 304.41, 304.411, 304.419, 304.42, 304.42, 304.421, 304.429, 304.43, 304.43, 304.431, 304.439, 304.49, 304.5, 304.5, 304.509, 304.51, 304.51, 304.519, 304.52, 304.52, 304.529, 304.53, 304.53, 304.539, 304.59, 304.6, 304.6, 304.609, 304.61, 304.61, 304.619, 304.62, 304.62, 304.629, 304.63, 304.63, 304.639, 304.7, 304.71, 304.72, 304.73, 304.8, 304.81, 304.82, 304.83,</p>                                                                                                                                                                                                                                                                                                                                                                                                                                                                                                                                                                                                                                                                                                                                                                                                                                                                                                                                                                                                                                                                                                                                                                                                                                                                                                                                                                 |

|               |                                                                                                                                                                                                                                                                                                                                                                                                                                                                                                                                                                                                                                                                                                                                                                                                                                                                                                                                                                                                                                                                                                                                                                                                                                                                                                                                                                                                                                                                                                                                                                                                                                                                                                                                                                                                                                                                                                                                                                                                                                                                                                                                                                                                                                                                                  |
|---------------|----------------------------------------------------------------------------------------------------------------------------------------------------------------------------------------------------------------------------------------------------------------------------------------------------------------------------------------------------------------------------------------------------------------------------------------------------------------------------------------------------------------------------------------------------------------------------------------------------------------------------------------------------------------------------------------------------------------------------------------------------------------------------------------------------------------------------------------------------------------------------------------------------------------------------------------------------------------------------------------------------------------------------------------------------------------------------------------------------------------------------------------------------------------------------------------------------------------------------------------------------------------------------------------------------------------------------------------------------------------------------------------------------------------------------------------------------------------------------------------------------------------------------------------------------------------------------------------------------------------------------------------------------------------------------------------------------------------------------------------------------------------------------------------------------------------------------------------------------------------------------------------------------------------------------------------------------------------------------------------------------------------------------------------------------------------------------------------------------------------------------------------------------------------------------------------------------------------------------------------------------------------------------------|
|               | <p>304.9, 304.9, 304.909, 304.91, 304.91, 304.919, 304.92, 304.92, 304.929, 304.93, 304.93, 304.939, 304.99</p> <p>ICD10CM: F11.20, F11.21, F11.220, F11.221, F11.222, F11.229, F11.23, F11.24, F11.250, F11.251, F11.259, F11.281, F11.282, F11.288, F11.29, F12.20, F12.21, F12.220, F12.221, F12.222, F12.229, F12.250, F12.251, F12.259, F12.280, F12.288, F12.29, F14.20, F14.21, F14.220, F14.221, F14.222, F14.229, F14.23, F14.24, F14.250, F14.251, F14.259, F14.280, F14.281, F14.282, F14.288, F14.29, F15.20, F15.21, F15.220, F15.221, F15.222, F15.229, F15.23, F15.24, F15.250, F15.251, F15.259, F15.280, F15.281, F15.282, F15.288, F15.29, F15.90, F15.920, F15.921, F15.922, F15.929, F15.93, F15.94, F15.950, F15.951, F15.959, F15.980, F15.981, F15.982, F15.988, F15.99</p>                                                                                                                                                                                                                                                                                                                                                                                                                                                                                                                                                                                                                                                                                                                                                                                                                                                                                                                                                                                                                                                                                                                                                                                                                                                                                                                                                                                                                                                                               |
| Emphysema     | <p>ICD9CM: 492, 492.8, 518.1, 518.2, 770.2, 958.7, 998.81</p> <p>ICD10CM: J43.0, J43.1, J43.2, J43.8, J43.9, J98.2, J98.3, P25.0, P25.8, T79.7XXA, T79.7XXD, T79.7XXS, T81.82XA, T81.82XD, T81.82XS</p>                                                                                                                                                                                                                                                                                                                                                                                                                                                                                                                                                                                                                                                                                                                                                                                                                                                                                                                                                                                                                                                                                                                                                                                                                                                                                                                                                                                                                                                                                                                                                                                                                                                                                                                                                                                                                                                                                                                                                                                                                                                                          |
| Heart Disease | <p>ICD9CM: 391.1, 391.2, 391.8, 391.9, 392, 392.9, 393, 394.1, 395.1, 395.2, 395.9, 397.1, 397.9, 398, 398.9, 398.91, 398.99, 401.1, 401.9, 402, 402.01, 402.1, 402.11, 402.9, 402.91, 404.01, 404.02, 404.03, 404.1, 404.11, 404.12, 404.13, 404.9, 404.91, 404.92, 404.93, 405.01, 405.09, 405.11, 405.19, 405.91, 405.99, 414.01, 414.1, 414.11, 414.12, 414.19, 414.3, 414.4, 415, 415.1, 415.11, 415.12, 415.13, 415.19, 416, 416.1, 416.2, 416.8, 416.9, 417, 417.1, 417.8, 417.9, 424.2, 424.3, 428.1, 428.21, 428.22, 428.23, 428.31, 428.32, 428.33, 428.41, 428.42, 428.43, 428.9, 437.3, 440.1, 440.2, 440.21, 440.22, 440.23, 440.29, 440.8, 441.1, 441.2, 441.3, 441.4, 441.5, 441.6, 441.7, 441.9, 442, 442.1, 442.2, 442.3, 442.81, 442.82, 442.83, 442.84, 442.89, 442.9, 459.3, 459.31, 459.32, 459.33, 459.39, 517.1, 714.4, 725, 796.2, V12.55</p> <p>ICD10CM: I00, I01.0, I01.1, I01.2, I01.8, I01.9, I02.0, I02.9, I05.0, I05.1, I05.2, I05.8, I05.9, I06.0, I06.1, I06.2, I06.8, I06.9, I07.0, I07.1, I07.2, I07.8, I07.9, I08.0, I08.1, I08.2, I08.3, I08.8, I08.9, I09.0, I09.1, I09.2, I09.81, I09.89, I09.9, I11.0, I13.0, I13.2, I20.0, I20.1, I20.8, I20.9, I24.0, I24.8, I24.9, I25.10, I25.110, I25.111, I25.118, I25.119, I25.2, I25.3, I25.41, I25.5, I25.6, I25.700, I25.701, I25.708, I25.709, I25.710, I25.711, I25.718, I25.719, I25.720, I25.721, I25.728, I25.729, I25.730, I25.731, I25.738, I25.739, I25.750, I25.751, I25.758, I25.759, I25.760, I25.761, I25.768, I25.769, I25.790, I25.791, I25.798, I25.799, I25.810, I25.811, I25.812, I25.82, I25.83, I25.84, I25.89, I25.9, I27.0, I27.1, I27.2, I27.20, I27.21, I27.22, I27.23, I27.24, I27.29, I27.81, I27.82, I27.83, I27.89, I27.9, I28.0, I28.1, I28.8, I28.9, I50.1, I50.20, I50.21, I50.22, I50.23, I50.30, I50.31, I50.32, I50.33, I50.40, I50.41, I50.42, I50.43, I50.810, I50.811, I50.812, I50.813, I50.814, I50.82, I50.83, I50.84, I50.89, I50.9, I51.0, I51.1, I51.2, I51.3, I51.5, I51.7, I51.81, I51.89, I51.9, I52., I97.130, I97.131, M05.30, M05.311, M05.312, M05.319, M05.321, M05.322, M05.329, M05.331, M05.332, M05.339, M05.341, M05.342, M05.349, M05.351, M05.352, M05.359, M05.361, M05.362, M05.369, M05.371, M05.372, M05.379, M05.39, O29.121,</p> |

|                                |                                                                                                                                                                                                                                                                                                                                                                                                                                                                                                                                                                                                                                                                                                                                                                                                                                             |
|--------------------------------|---------------------------------------------------------------------------------------------------------------------------------------------------------------------------------------------------------------------------------------------------------------------------------------------------------------------------------------------------------------------------------------------------------------------------------------------------------------------------------------------------------------------------------------------------------------------------------------------------------------------------------------------------------------------------------------------------------------------------------------------------------------------------------------------------------------------------------------------|
|                                | O29.122, O29.123, O29.129, Z95.1, Z95.5, Z95.811, Z95.812, Z98.61                                                                                                                                                                                                                                                                                                                                                                                                                                                                                                                                                                                                                                                                                                                                                                           |
| Heart Failure (non-congestive) | ICD9CM: 410.52, 410.6, 410.6, 410.61, 410.62, 410.7, 410.7, 410.71, 410.72, 410.8, 410.8, 410.81, 410.82, 410.9, 410.9, 410.91, 410.92, 411, 411.1, 411.1, 411.8, 411.81, 411.89, 412, 414, 414, 414.01, 414.02, 414.03, 414.04, 414.05, 414.06, 414.07, 414.2, 414.3, 414.4<br><br>ICD10CM: I09.81, I11.0, I13.0, I13.2, I50.1, I50.20, I50.21, I50.22, I50.23, I50.30, I50.31, I50.32, I50.33, I50.40, I50.41, I50.42, I50.43, I50.810, I50.811, I50.812, I50.813, I50.814, I50.82, I50.83, I50.84, I50.89, I50.9, I97.130, I97.131, O29.121, O29.122, O29.123, O29.129, Z95.811, Z95.812                                                                                                                                                                                                                                                 |
| HIV                            | ICD9CM: 42, 42, 42.1, 42.2, 42.9<br><br>ICD10CM: B20., Z21.                                                                                                                                                                                                                                                                                                                                                                                                                                                                                                                                                                                                                                                                                                                                                                                 |
| Hypertension                   | ICD9CM: 401, 401.1, 401.9, 402, 402.01, 402.1, 402.11, 402.9, 402.91, 403, 403, 403.01, 403.1, 403.1, 403.11, 403.9, 403.9, 403.91, 404, 404, 404.01, 404.02, 404.03, 404.1, 404.1, 404.11, 404.12, 404.13, 404.9, 404.9, 404.91, 404.92, 404.93, 405.01, 405.09, 405.11, 405.19, 405.91, 405.99, 437.2, 642, 642.01, 642.02, 642.03, 642.04, 642.1, 642.11, 642.12, 642.13, 642.14, 642.2, 642.21, 642.22, 642.23, 642.24, 642.3, 642.31, 642.32, 642.33, 642.34, 642.4, 642.41, 642.42, 642.43, 642.44, 642.5, 642.51, 642.52, 642.53, 642.54, 642.6, 642.61, 642.62, 642.63, 642.64, 642.7, 642.71, 642.72, 642.73, 642.74, 642.9, 642.91, 642.92, 642.93, 642.94<br><br>ICD10CM: I10., O10.011, O10.012, O10.013, O10.019, O10.02, O10.03, O10.911, O10.912, O10.913, O10.919, O10.92, O10.93, O16.1, O16.2, O16.3, O16.4, O16.5, O16.9 |
| Lower Respiratory Infection    | ICD9CM: J06.9, J22., J47.0, J80., J98.8<br><br>ICD10CM: 494.1, 518.82, 519.8                                                                                                                                                                                                                                                                                                                                                                                                                                                                                                                                                                                                                                                                                                                                                                |
| Obstructive Sleep Apnea        | ICD9CM: 327.23<br><br>ICD10CM: G47.30, G47.31, G47.32, G47.33, G47.34, G47.35, G47.36, G47.37, G47.39                                                                                                                                                                                                                                                                                                                                                                                                                                                                                                                                                                                                                                                                                                                                       |

**Mechanical Ventilation Outcome,**

|                        |                                                                                                                                                                                                                                                                                                                         |
|------------------------|-------------------------------------------------------------------------------------------------------------------------------------------------------------------------------------------------------------------------------------------------------------------------------------------------------------------------|
| Mechanical Ventilation | ICD9CM: 96.70, 96.71, 96.72<br><br>ICD10CM: 09HN7BZ, 09HN8BZ, 0DL57DZ, 0DL58DZ, 5A09357, 5A09358, 5A09359, 5A0935B, 5A0935Z, 5A09457, 5A09458, 5A09459, 5A0945B, 5A0945Z, 5A09557, 5A09558, 5A09559, 5A0955B, 5A0955Z, 5A19054, 5A1935Z, 5A1945Z, 5A1955Z,<br><br>CPT4: 4168F, E0463, 94002, 94003, 94004, 94656, 94657 |
|------------------------|-------------------------------------------------------------------------------------------------------------------------------------------------------------------------------------------------------------------------------------------------------------------------------------------------------------------------|

*\*In addition to the ICD-9, ICD-10, and CPT codes listed here, covariates were also defined in the COVID-19 Shared Data Resource domain using natural language processing and keyword text searching of medical encounter notes, laboratory tests, and medications (see text).*

**Supplemental Table 2.** COVID-19 symptoms in the 30 days prior to index date, stratified by PPI user status, unweighted and weighted cohorts

| Symptom, N (%)  | UNWEIGHTED COHORT of veterans with positive SARS-CoV-2 test |                             | WEIGHTED COHORT of veterans with positive SARS-CoV-2 test |                             | SMD   |
|-----------------|-------------------------------------------------------------|-----------------------------|-----------------------------------------------------------|-----------------------------|-------|
|                 | PPI non-users (N=8,696)                                     | Current PPI users (N=6,262) | PPI non-users (N=8,696)                                   | Current PPI users (N=6,262) |       |
| Asymptomatic    | 4,089 (47.0)                                                | 2,644 (42.2)                | 4,051 (46.6)                                              | 2,669 (42.6)                | 0.080 |
| Chills          | 128 (1.5)                                                   | 102 (1.6)                   | 127 (1.5)                                                 | 105 (1.7)                   | 0.017 |
| Cold            | 2,430 (27.9)                                                | 1,786 (28.5)                | 2,397 (27.6)                                              | 1,800 (28.8)                | 0.026 |
| Cough           | 2,678 (30.8)                                                | 2,014 (32.2)                | 2,687 (30.9)                                              | 2,005 (32.0)                | 0.024 |
| Dyspnea         | 2,460 (28.3)                                                | 1,996 (31.9)                | 2,525 (29.0)                                              | 1,919 (30.6)                | 0.035 |
| Fatigue         | 507 (5.8)                                                   | 463 (7.4)                   | 539 (6.2)                                                 | 428 (6.8)                   | 0.025 |
| Fever           | 2,513 (28.9)                                                | 1,942 (31.0)                | 2,513 (28.9)                                              | 1,966 (31.4)                | 0.055 |
| Headache        | 1,146 (13.2)                                                | 878 (14.0)                  | 1,125 (12.9)                                              | 897 (14.3)                  | 0.040 |
| Loss of Smell   | 420 (4.8)                                                   | 290 (4.6)                   | 394 (4.5)                                                 | 296 (4.7)                   | 0.009 |
| Loss of Taste   | 496 (5.7)                                                   | 348 (5.6)                   | 482 (5.5)                                                 | 353 (5.6)                   | 0.004 |
| Myalgias        | 144 (1.7)                                                   | 107 (1.7)                   | 139 (1.6)                                                 | 111 (1.8)                   | 0.014 |
| Rhinorrhea      | 11 (0.1)                                                    | 5 (0.1)                     | 11 (0.1)                                                  | 5 (0.1)                     | 0.014 |
| Abdominal Pain  | 284 (3.3)                                                   | 298 (4.8)                   | 295 (3.4)                                                 | 309 (4.9)                   | 0.077 |
| Diarrhea        | 1,004 (11.5)                                                | 803 (12.8)                  | 1,017 (11.7)                                              | 802 (12.8)                  | 0.034 |
| Nausea/Vomiting | 724 (8.3)                                                   | 629 (10.0)                  | 737 (8.5)                                                 | 641 (10.2)                  | 0.061 |

**Supplemental Table 3.** Characteristics of Veterans with SARS-CoV-2 testing (cohort for exploratory analysis), stratified by current PPI user vs. PPI non-user status

| COVARIATES                                                       | UNWEIGHTED COHORT of Veterans<br>with SARS-CoV-2 testing |                                | WEIGHTED COHORT of Veterans with<br>SARS-CoV-2 testing |                                | SMD    |
|------------------------------------------------------------------|----------------------------------------------------------|--------------------------------|--------------------------------------------------------|--------------------------------|--------|
|                                                                  | PPI non-users,<br>n=53,475                               | Current PPI users,<br>n=44,199 | PPI non-users,<br>n=53,475                             | Current PPI users,<br>n=44,199 |        |
| <b>VHA Facility<sup>^</sup></b>                                  | <sup>^</sup>                                             | <sup>^</sup>                   | <sup>^</sup>                                           | <sup>^</sup>                   | 0.027  |
| <b>Age, mean years (SD)</b>                                      | 61.1 (15.1)                                              | 64.6 (12.8)                    | 62.7 (14.3)                                            | 62.8 (14.0)                    | 0.011  |
| <b>Male sex, n (%)</b>                                           | 45,065 (84.3)                                            | 38,841 (12.8)                  | 45,985 (86)                                            | 38,115 (86.2)                  | 0.007  |
| <b>Race/ethnicity, n (%)</b>                                     |                                                          |                                |                                                        |                                | 0.009  |
| Non-Hispanic White                                               | 28,990 (54.2)                                            | 27,901 (63.1)                  | 31,049.0 (58.1)                                        | 25,802 (58.4)                  |        |
| Non-Hispanic Black                                               | 13,614 (25.5)                                            | 9,133 (20.7)                   | 12,536 (23.4)                                          | 10,313 (23.3)                  |        |
| Non-Hispanic other or unknown                                    | 5,008 (9.4)                                              | 3,335 (7.5)                    | 4,544 (8.5)                                            | 3,360 (8.3)                    |        |
| Hispanic                                                         | 5,863 (11.0)                                             | 3,830 (8.7)                    | 5,346 (10.0)                                           | 4424 (10.0)                    |        |
| <b>Days from Jan 1 2020 to index date, mean (SD)<sup>#</sup></b> | 247 (79.1)                                               | 244 (78.8)                     | 246 (78.9)                                             | 246 (78.8)                     | 0.003  |
| <b>Smoking Status, n (%)</b>                                     |                                                          |                                |                                                        |                                | 0.044  |
| Current Smoker                                                   | 10,725 (20.1)                                            | 8,625 (19.5)                   | 10,632 (19.9)                                          | 8,797 (19.9)                   |        |
| Former Smoker                                                    | 20,673 (38.7)                                            | 20,394 (46.1)                  | 22,491 (42.1)                                          | 18,811 (42.6)                  |        |
| Never Smoker                                                     | 18,212 (34.1)                                            | 13,993 (31.7)                  | 17,615 (32.9)                                          | 14,735 (33.3)                  |        |
| Unknown                                                          | 3,865 (7.2)                                              | 1,187 (2.7)                    | 2,737 (5.1)                                            | 1,856 (4.2)                    |        |
| <b>Comorbidities n (%)</b>                                       |                                                          |                                |                                                        |                                |        |
| Asthma                                                           | 3,990 (7.5)                                              | 4,679 (10.6)                   | 4,760.0 (8.9)                                          | 3,975 (9.0)                    | 0.003  |
| Coronary Artery Disease                                          | 10,600 (19.8)                                            | 13,465 (30.5)                  | 13,194 (24.7)                                          | 11,021 (24.9)                  | 0.006  |
| Cancer                                                           | 13,471 (25.2)                                            | 14,445 (32.7)                  | 15,320 (28.6)                                          | 12,808 (29.0)                  | 0.007  |
| Cardiomyopathy                                                   | 1,921 (3.6)                                              | 2,237 (5.1)                    | 2,312 (4.3)                                            | 1,925 (4.4)                    | 0.002  |
| Charleston Comorbidity Index, mean (SD)                          | 1.98 (2.32)                                              | 2.71 (2.58)                    | 2.32 (2.47)                                            | 2.35 (2.47)                    | 0.014  |
| Congestive Heart Failure                                         | 4,339 (8.1)                                              | 5,578 (12.6)                   | 5,456 (10.2)                                           | 4,543 (10.3)                   | 0.002  |
| Chronic Lung Disease                                             | 17,911 (33.5)                                            | 20,876 (47.2)                  | 21,307 (39.8)                                          | 17,814 (40.3)                  | 0.009  |
| Chronic Neuromuscular Disease                                    | 2,126 (4.0)                                              | 2,133 (4.8)                    | 2,357 (4.4)                                            | 1,971 (4.5)                    | 0.003  |
| Chronic Kidney Disease                                           | 7,488 (14.0)                                             | 8,382 (19.0)                   | 8,755 (16.4)                                           | 7,301 (16.5)                   | 0.004  |
| Chronic Kidney Failure                                           | 1,005 (1.9)                                              | 1,031 (2.3)                    | 1,126 (2.1)                                            | 942 (2.1)                      | 0.002  |
| Chronic Obstructive Pulmonary Disease                            | 9,819 (18.4)                                             | 13,103 (29.6)                  | 12,589 (23.5)                                          | 10,526 (23.8)                  | 0.006  |
| Central Sleep Apnea                                              | 206 (0.4)                                                | 249 (0.6)                      | 257 (0.5)                                              | 214 (0.5)                      | <0.001 |
| Cardiovascular Disease                                           | 18,936 (35.4)                                            | 21,655 (49.0)                  | 22,314 (41.7)                                          | 18,621 (42.1)                  | 0.008  |
| Diabetes                                                         | 17,393 (32.5)                                            | 18,799 (42.5)                  | 19,867 (37.2)                                          | 16,551 (37.4)                  | 0.006  |
| Drug Dependency                                                  | 4,094 (7.7)                                              | 3,390 (7.7)                    | 4,076 (7.6)                                            | 3,391 (7.7)                    | 0.002  |
| Emphysema                                                        | 1,053 (2.0)                                              | 1,461 (3.3)                    | 1,369 (2.6)                                            | 1,153 (2.6)                    | 0.003  |
| Heart Disease                                                    | 13,506 (25.3)                                            | 16,318 (36.9)                  | 16,388 (30.6)                                          | 13,650 (30.9)                  | 0.005  |
| Heart Failure (non-congestive)                                   | 5,381 (10.1)                                             | 6,799 (15.4)                   | 6,705 (12.5)                                           | 5,572 (12.6)                   | 0.002  |
| <i>H. pylori</i> positive                                        | 10,114 (18.9)                                            | 7,217 (16.3)                   | 9491 (17.7)                                            | 7,813 (17.7)                   | 0.005  |
| HIV                                                              | 846 (1.6)                                                | 407 (0.9)                      | 706 (1.3)                                              | 602 (1.4)                      | 0.004  |
| Hypertension                                                     | 31,542 (59.0)                                            | 32,847 (74.3)                  | 35,307 (66.0)                                          | 29,548 (66.9)                  | 0.018  |
| Lower Respiratory Infection                                      | 5,570 (10.4)                                             | 5,468 (12.4)                   | 6,082 (11.4)                                           | 5,074 (11.5)                   | 0.003  |
| Obstructive Sleep Apnea                                          | 16,711 (31.3)                                            | 18,792 (42.5)                  | 19,519 (36.5)                                          | 16,402 (37.1)                  | 0.014  |
| <b>Medications, n (%)</b>                                        |                                                          |                                |                                                        |                                |        |
| ACE Inhibitors                                                   | 14,334 (26.8)                                            | 15,559 (35.2)                  | 16,472 (30.8)                                          | 13,777 (31.2)                  | 0.008  |
| ARBs                                                             | 6,808 (12.7)                                             | 8,221 (18.6)                   | 8,240 (15.4)                                           | 6,923 (15.7)                   | 0.007  |
| H2RAs                                                            | 3,902 (7.3)                                              | 3,587 (8.1)                    | 4,246 (7.9)                                            | 3,587 (8.1)                    | 0.006  |

|         |               |               |               |               |       |
|---------|---------------|---------------|---------------|---------------|-------|
| NSAIDs  | 34,486 (64.5) | 34,028 (77.0) | 37,541 (70.2) | 31,520 (71.3) | 0.024 |
| Statins | 25,878 (48.4) | 29,841 (67.5) | 30,506 (57.0) | 25,674 (58.1) | 0.021 |



Abbreviations: Angiotensin converting enzyme inhibitors (ACE inhibitors); Angiotensin II receptor blockers (ARBs); *Helicobacter pylori* (*H. pylori*); Histamine-2 receptor antagonists (H2RAs); Non-steroidal anti-inflammatory agents (NSAIDs); Proton pump inhibitor (PPI); standard deviation (SD); standardized mean difference (SMD); Veterans Health Administration (VHA)

<sup>^</sup>Each of the 127 VHA facilities were included as covariates in this analysis; however, the proportion of patients at each station for each group is not listed here due to space considerations.

<sup>#</sup>This variable represents the days from January 1, 2020 to the index date of SARS-CoV-2 testing to account for temporal differences. Please refer text for additional details.

**Supplemental Figure 1. Proportion of SARS-CoV-2 positive testing among veterans tested through January 9, 2021.** Histogram illustrating the number of SARS-CoV-2 tests performed within the VHA nationwide between March 1, 2020 through January 9, 2021, and the proportion of positive test results. The magnitude and temporality of the SARS-CoV-2 positivity rate reflects the overall observed trend nationally during this time period.

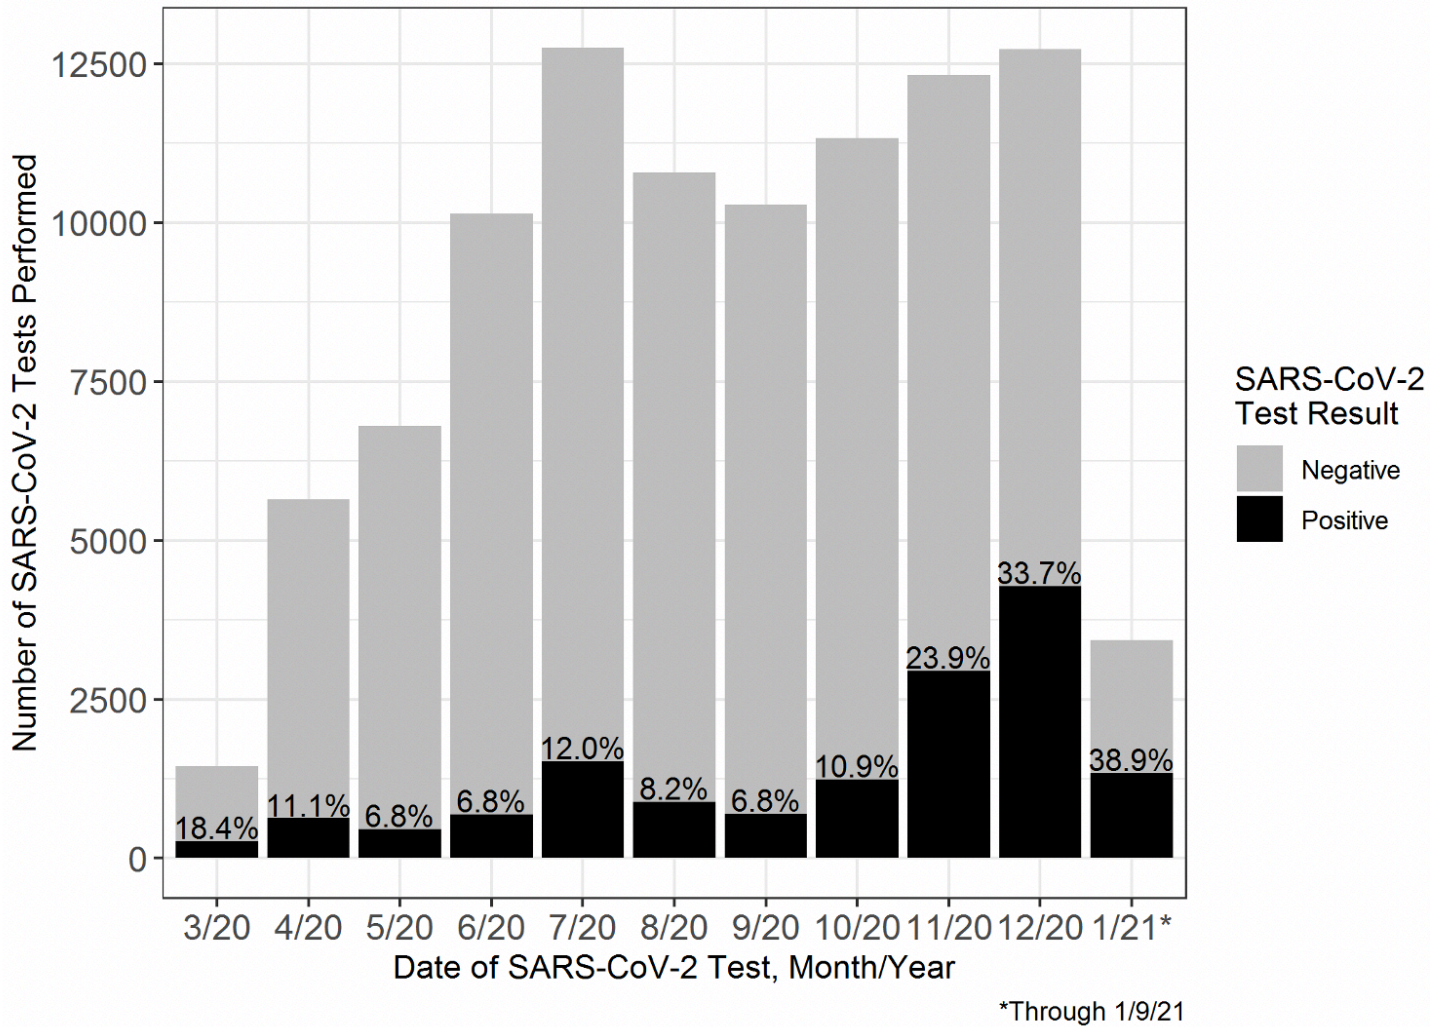

**Supplemental Figure 2. Distribution of propensity scores for current PPI users vs. non-users among veterans who tested positive for SARS-CoV-2 (N=14,958; primary analytic cohort).** Propensity score (PS) weighting was used to balance covariate distributions between PPI users and PPI non-users. We calculated the Average Treatment Effect (ATE) weights as the inverse of the probability of the observed PPI use statuses. Weights were scaled by a constant so that the sum of weights equaled the unweighted cohort's sample size. To balance the large number of covariates, PS were calculated via cross-validated logistic ridge regression models with optimal shrinkage parameters. To balance nonlinear associations with PPI use, the PS models included restricted cubic splines on all continuous covariates, including the date of positive SARS-CoV-2 testing (index date). As determined based on sufficient overlap in the PS, balance was achieved without extreme weights (see Supplemental Figure 3)

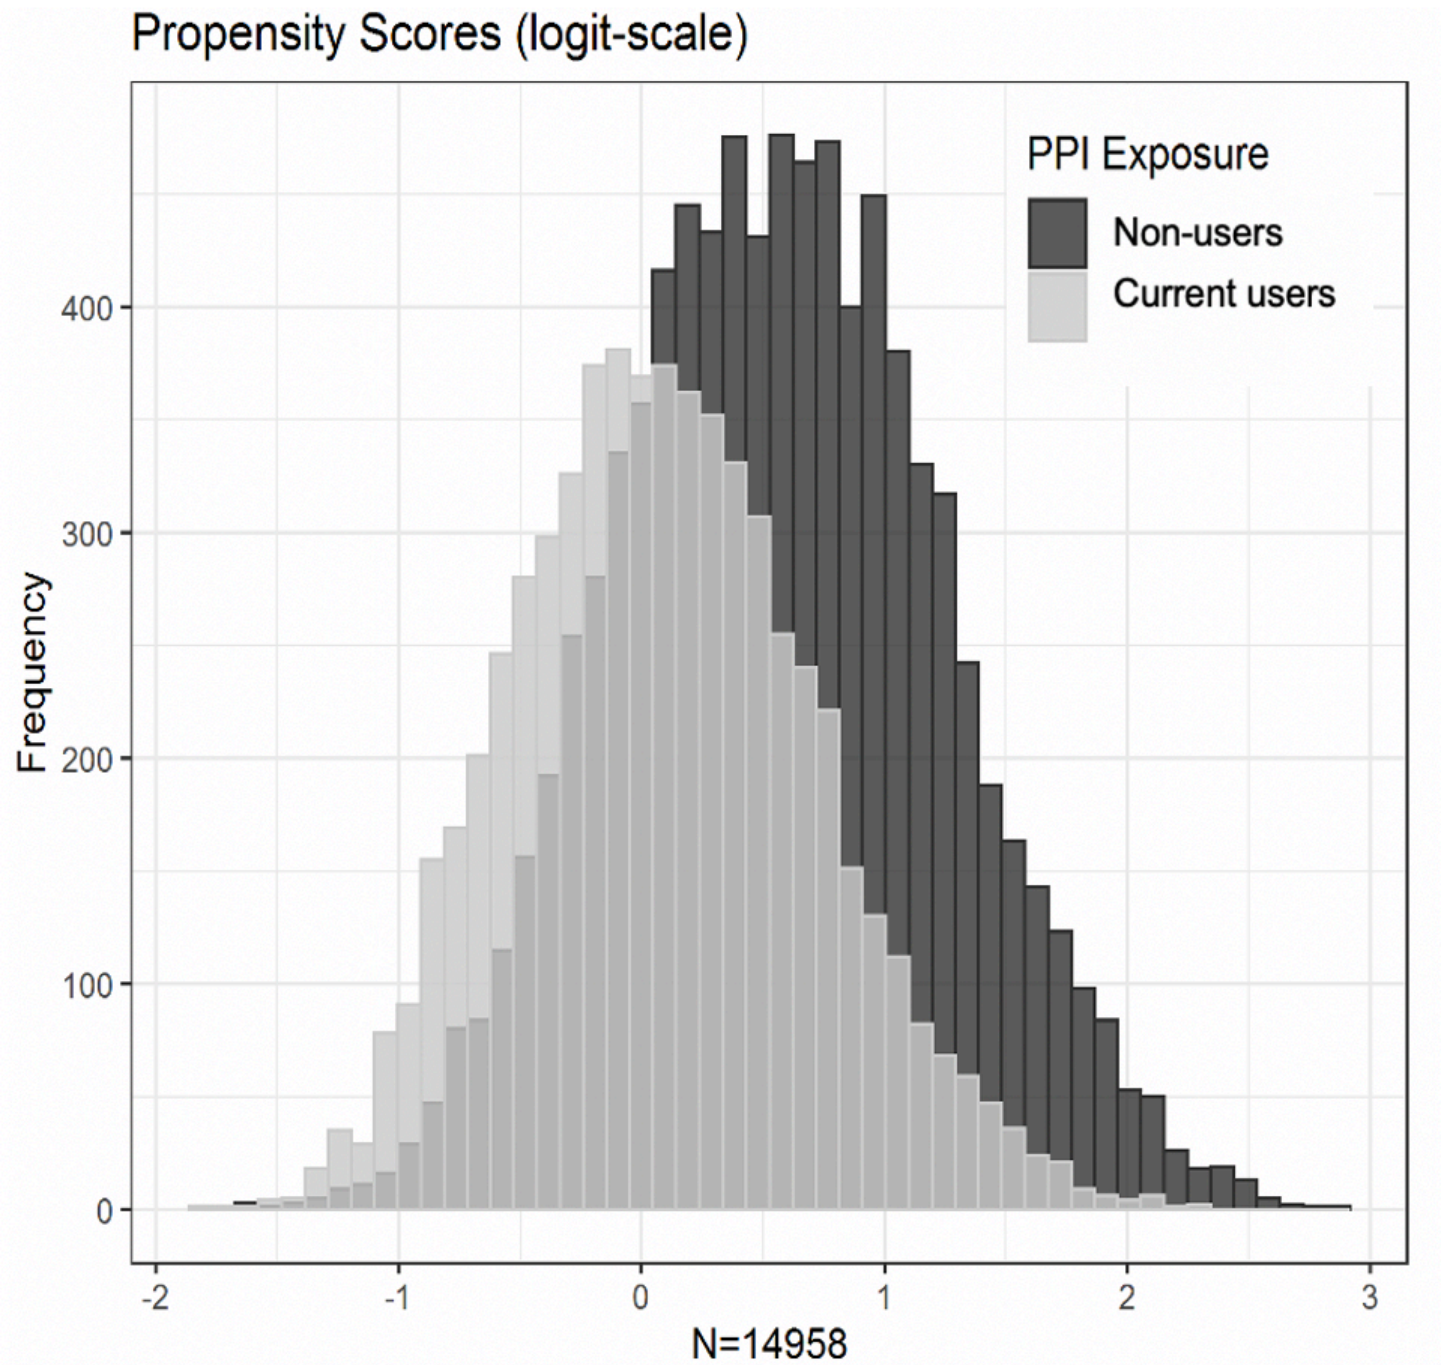

**Supplemental Figure 3. Plot of standardized mean differences for covariates between current PPI users and non-users for the unweighted and weighted cohorts.** Standardized mean differences (SMDs) were used to compare the means and standard deviations (SD) for continuous variables and proportions for categorical variables between current PPI users and non-users. SMDs are the preferred measure of covariate balance in large cohorts. Smaller SMDs indicate better balance between groups, with a threshold of <0.1 (red vertical line) indicating adequate balance. As depicted in the SMD plot of both the unweighted and propensity score-weighted cohort, full covariate balance was achieved in the weighted cohort.

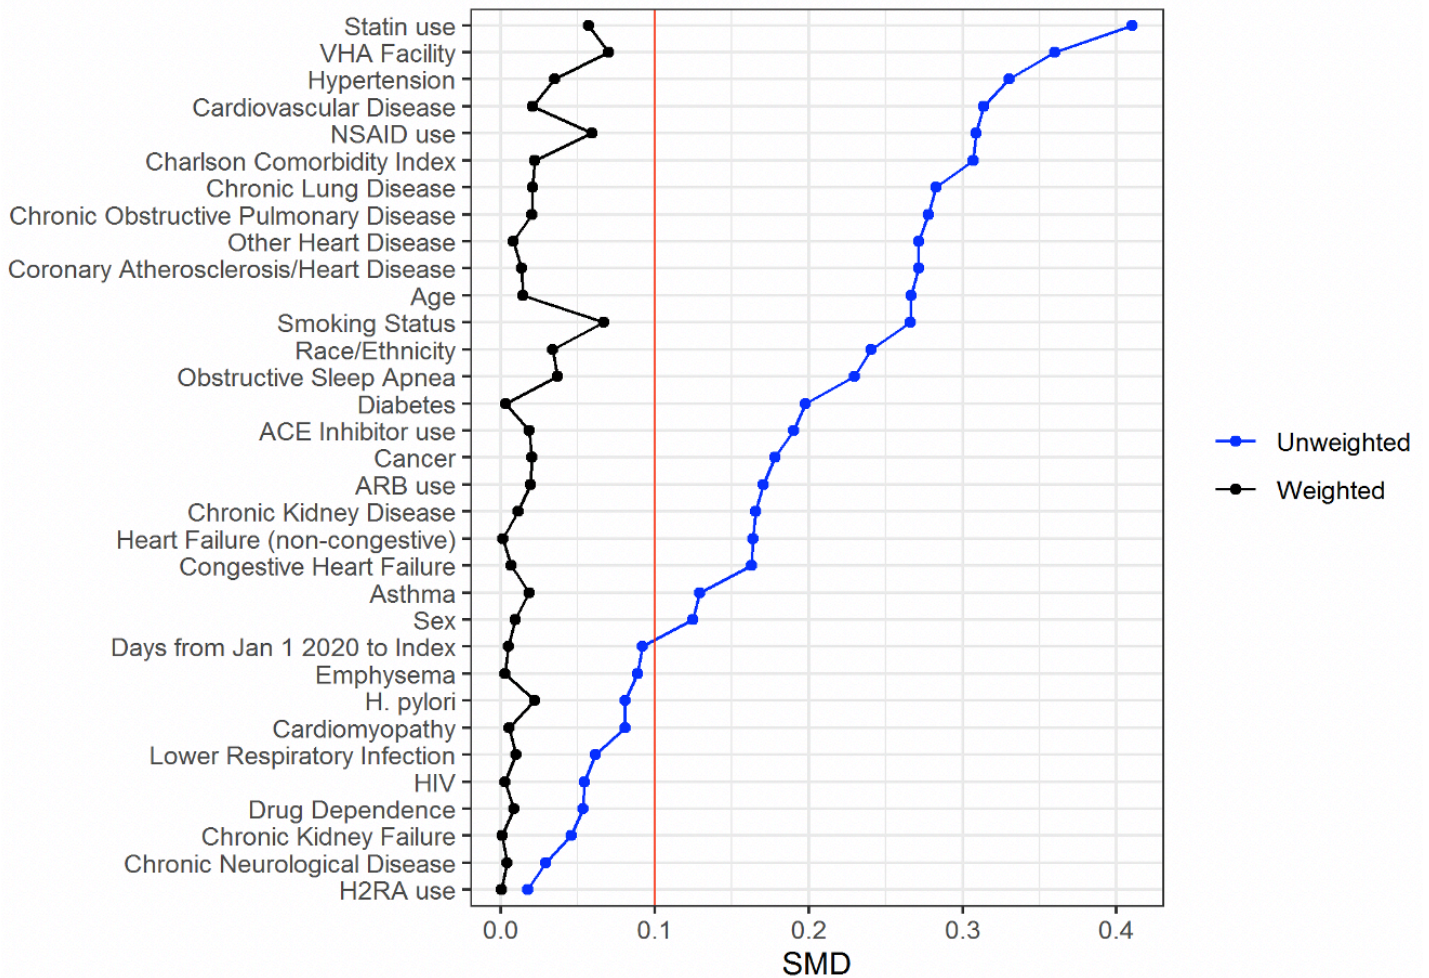

Supplement: Supplementary file [file media-1.pdf]
